# Supplementary material for: Fluorescent Aptasensor Based on Fe3O4@PPy
Source: Research Square preprint supplement (doi:10.21203/rs.3.rs-2601425/v1), 2023-02-23
Supplement: Supplementary file 1 [file 3736a55fa75f7f48775017ff.docx]

**Supporting information**

Fluorescent Aptasensor Based on Fe3O4@PPy

Zhe Jiaoa*, Shaohe Jiaob, Yueting Wanga, Weibin Chena, Yangzi Xiea, Xiaolin Zhanga, Long Yia

aSchool of Environment and Civil Engineering, Dongguan University of Technology, Dongguan 523808, China.

bTobacco Science Institute of Jiangxi Province, Nanchang 330025, China


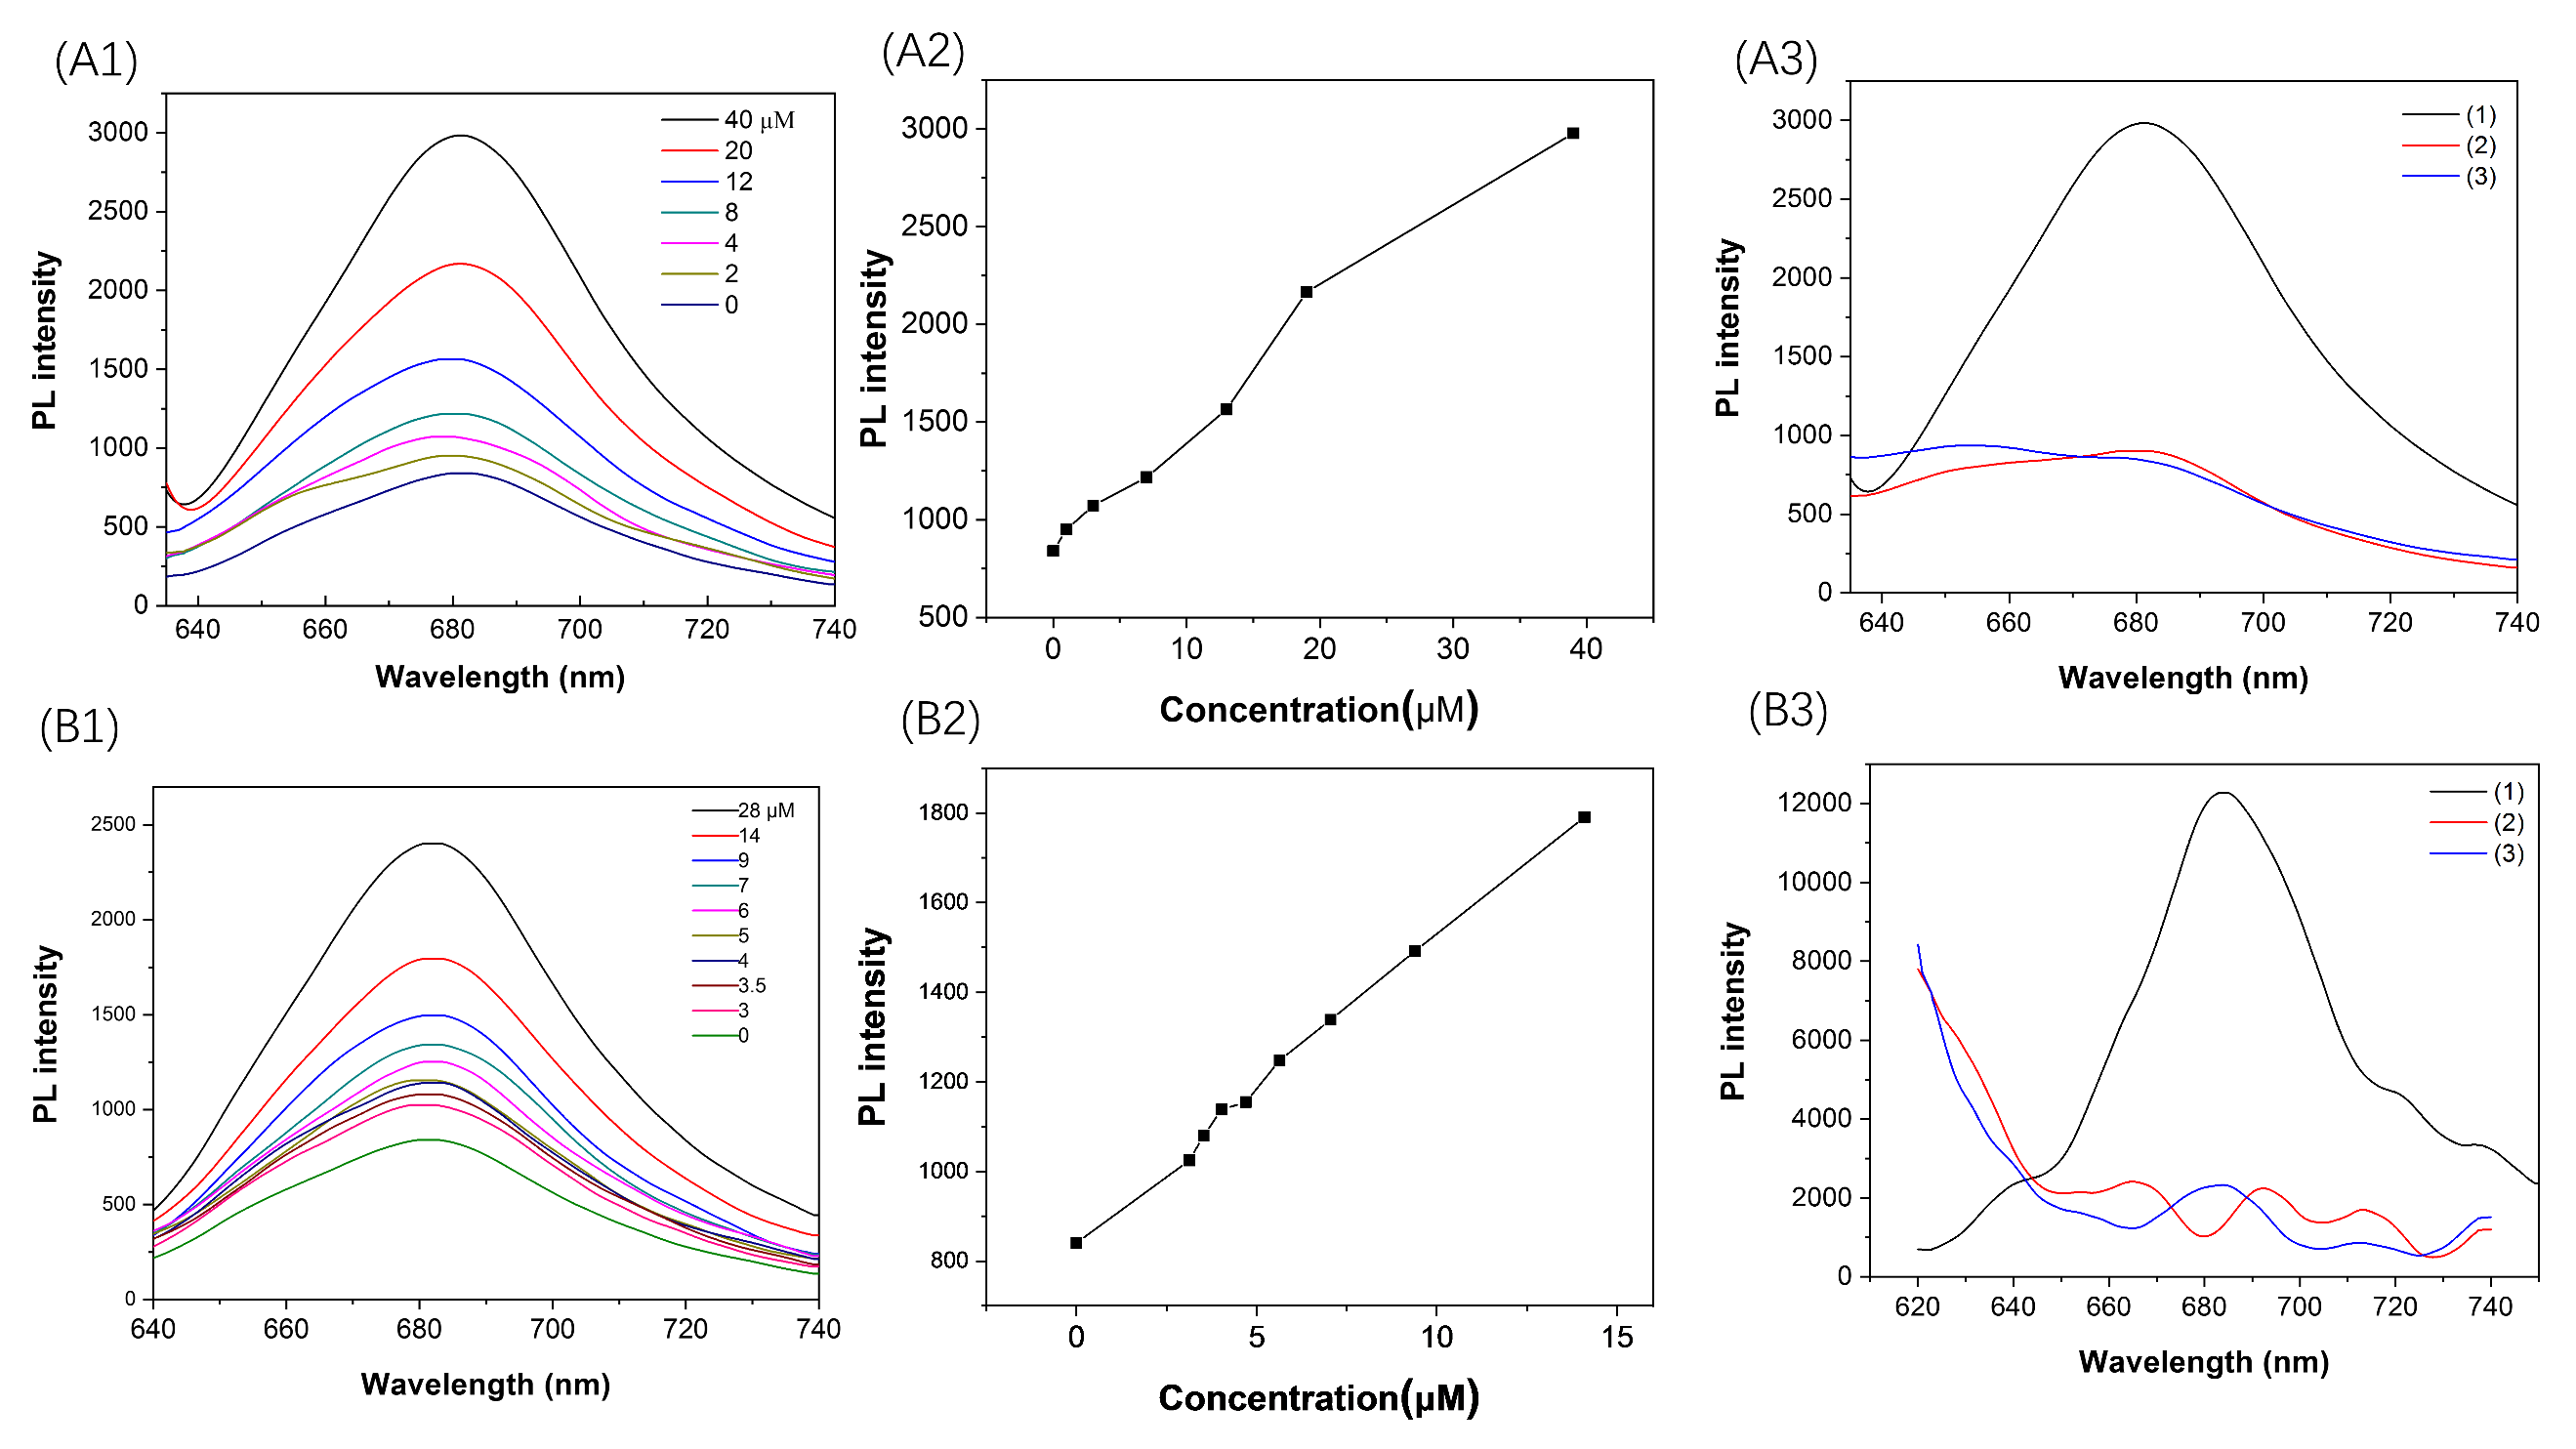


Figure S1 The PL spectra of MG (A1, B1, C1) and PL intensity change of MG (A2, B2, C2) in the presence of different concentrations of different aptamer. (A) aptamer for acetamiprid; (B) aptamer for thrombin; (C) aptamer for Pb2+. concentration: 10 μM.


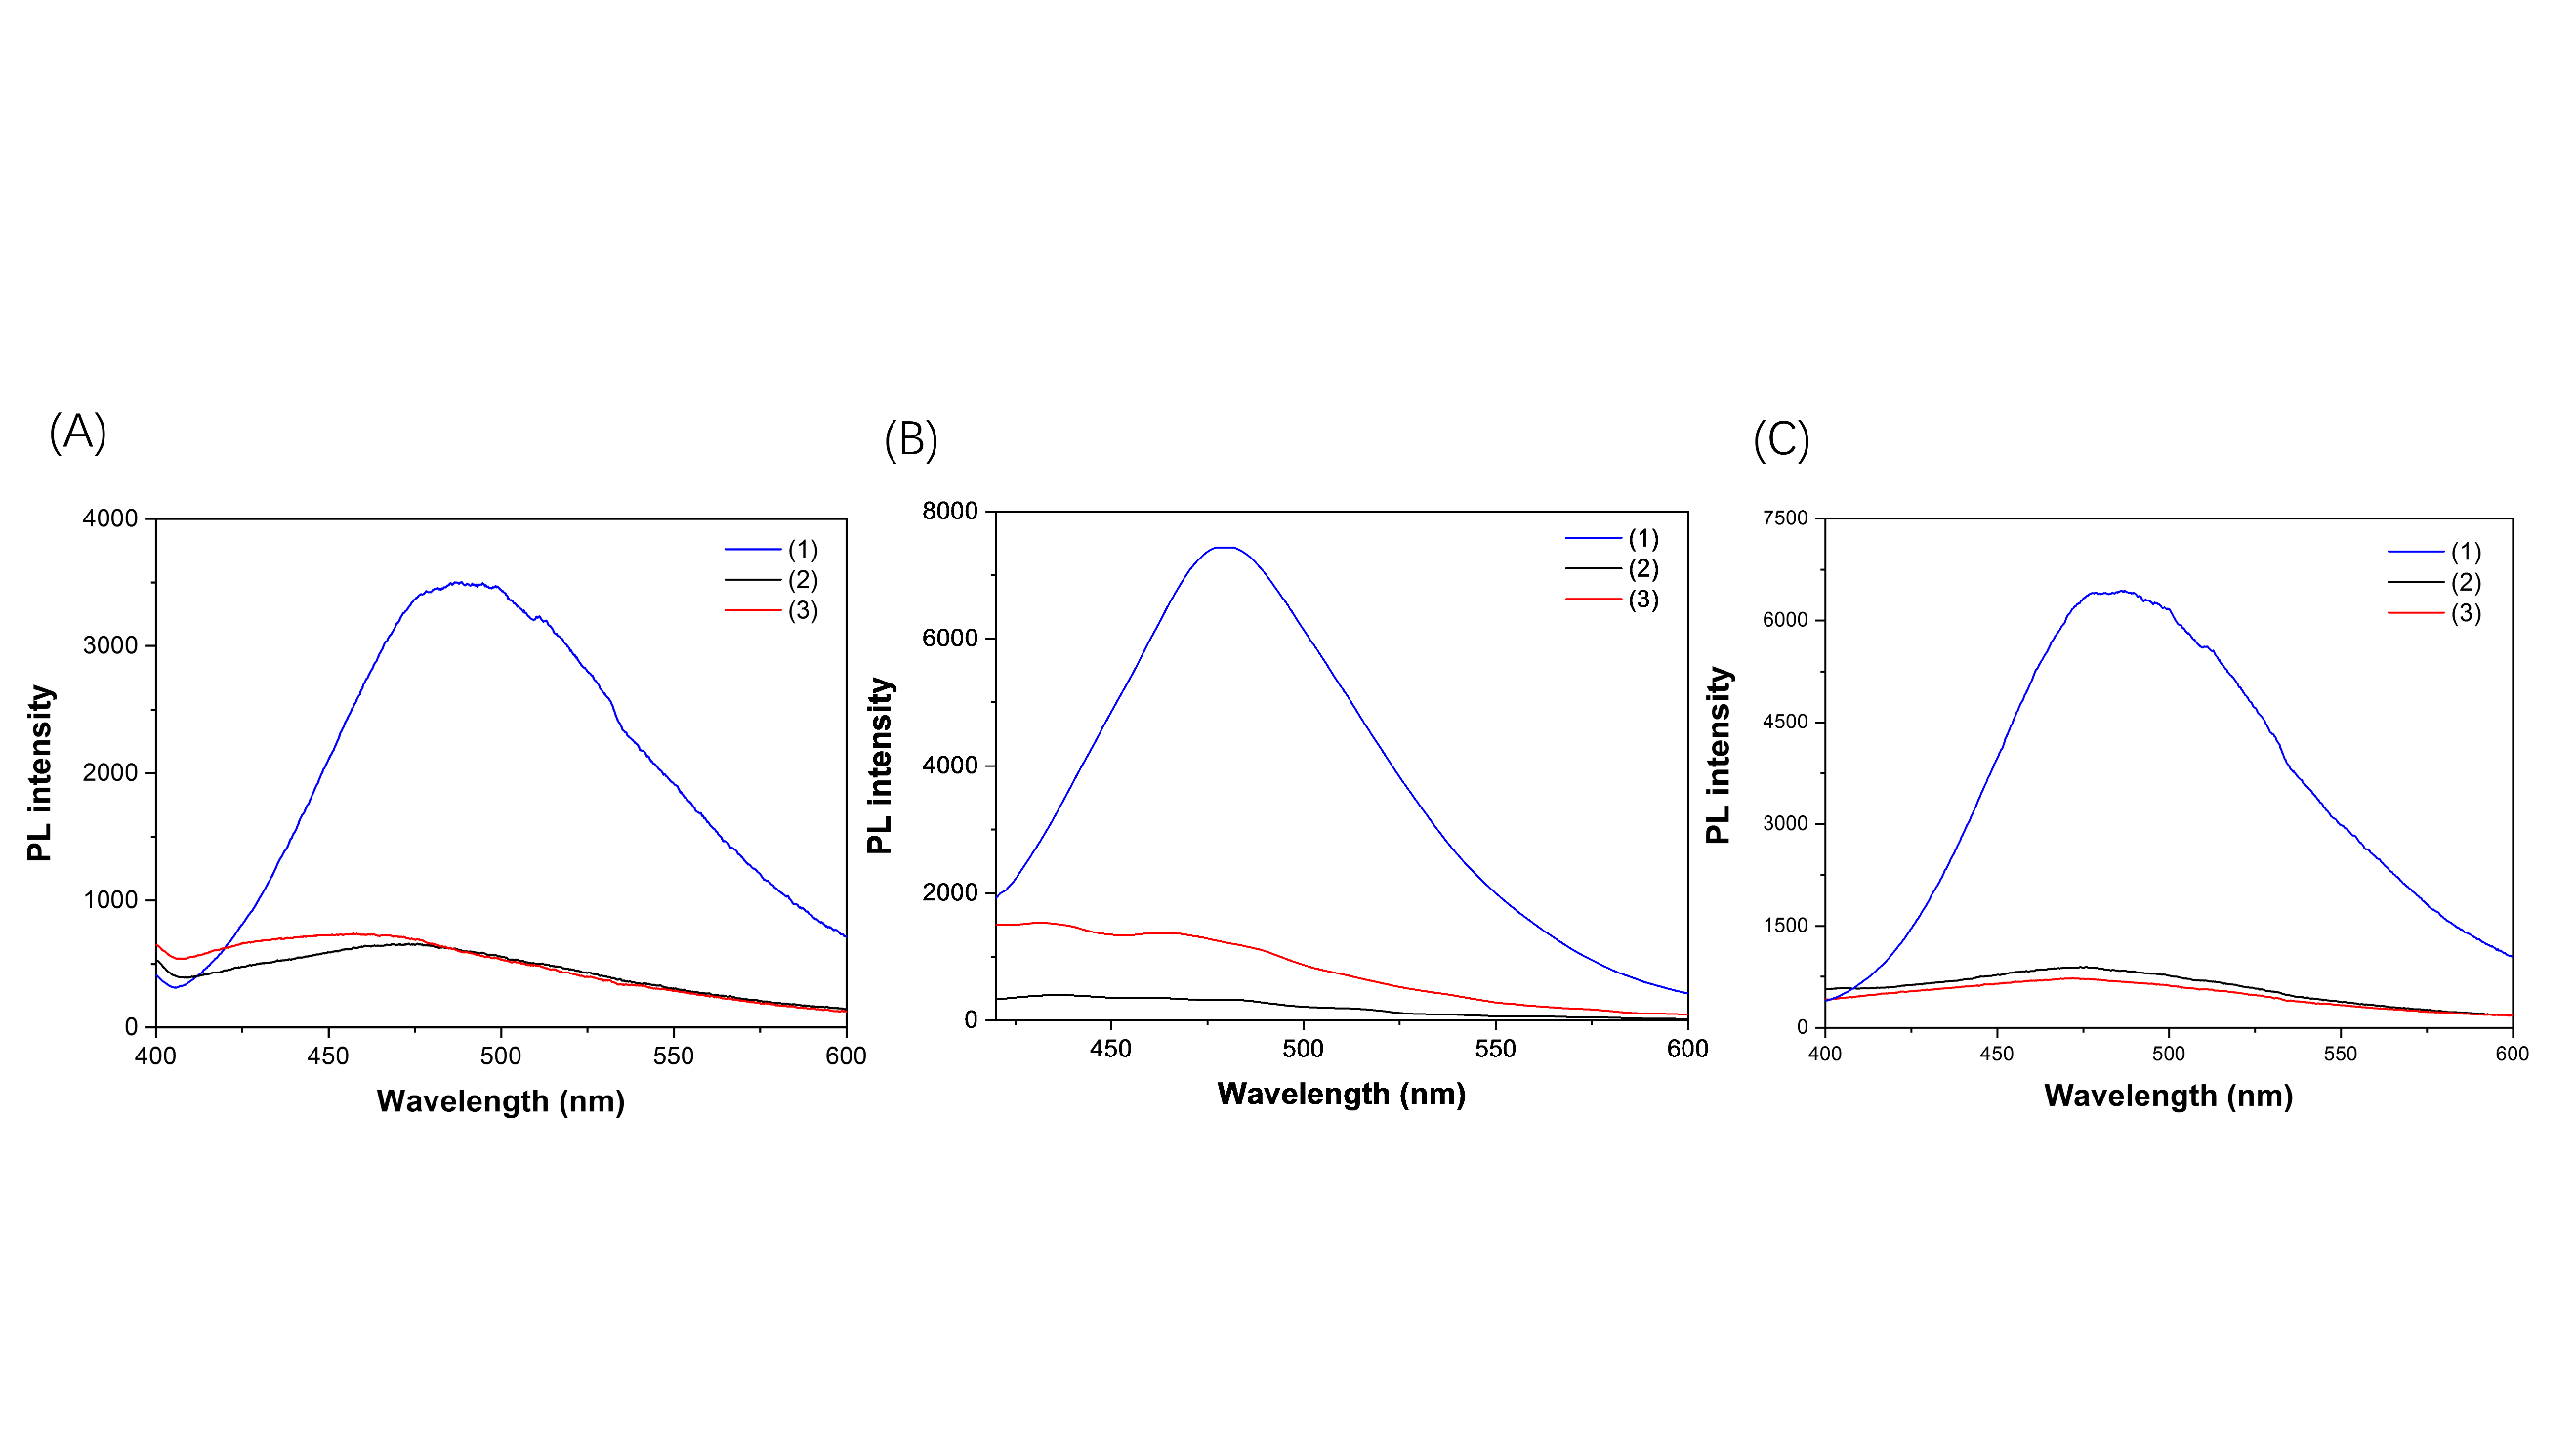


Figure S2 The PL spectra of TTAPE in different conditions (1) in the presence of aptamer; (2) in the presence of nuclease; (3) TTAPE; (A) aptamer for acetamiprid; (B) aptamer for thrombin; (C) aptamer for Pb2+. Experimental conditions: TTAPE, 10 nM; aptamer, 2.0 μM.


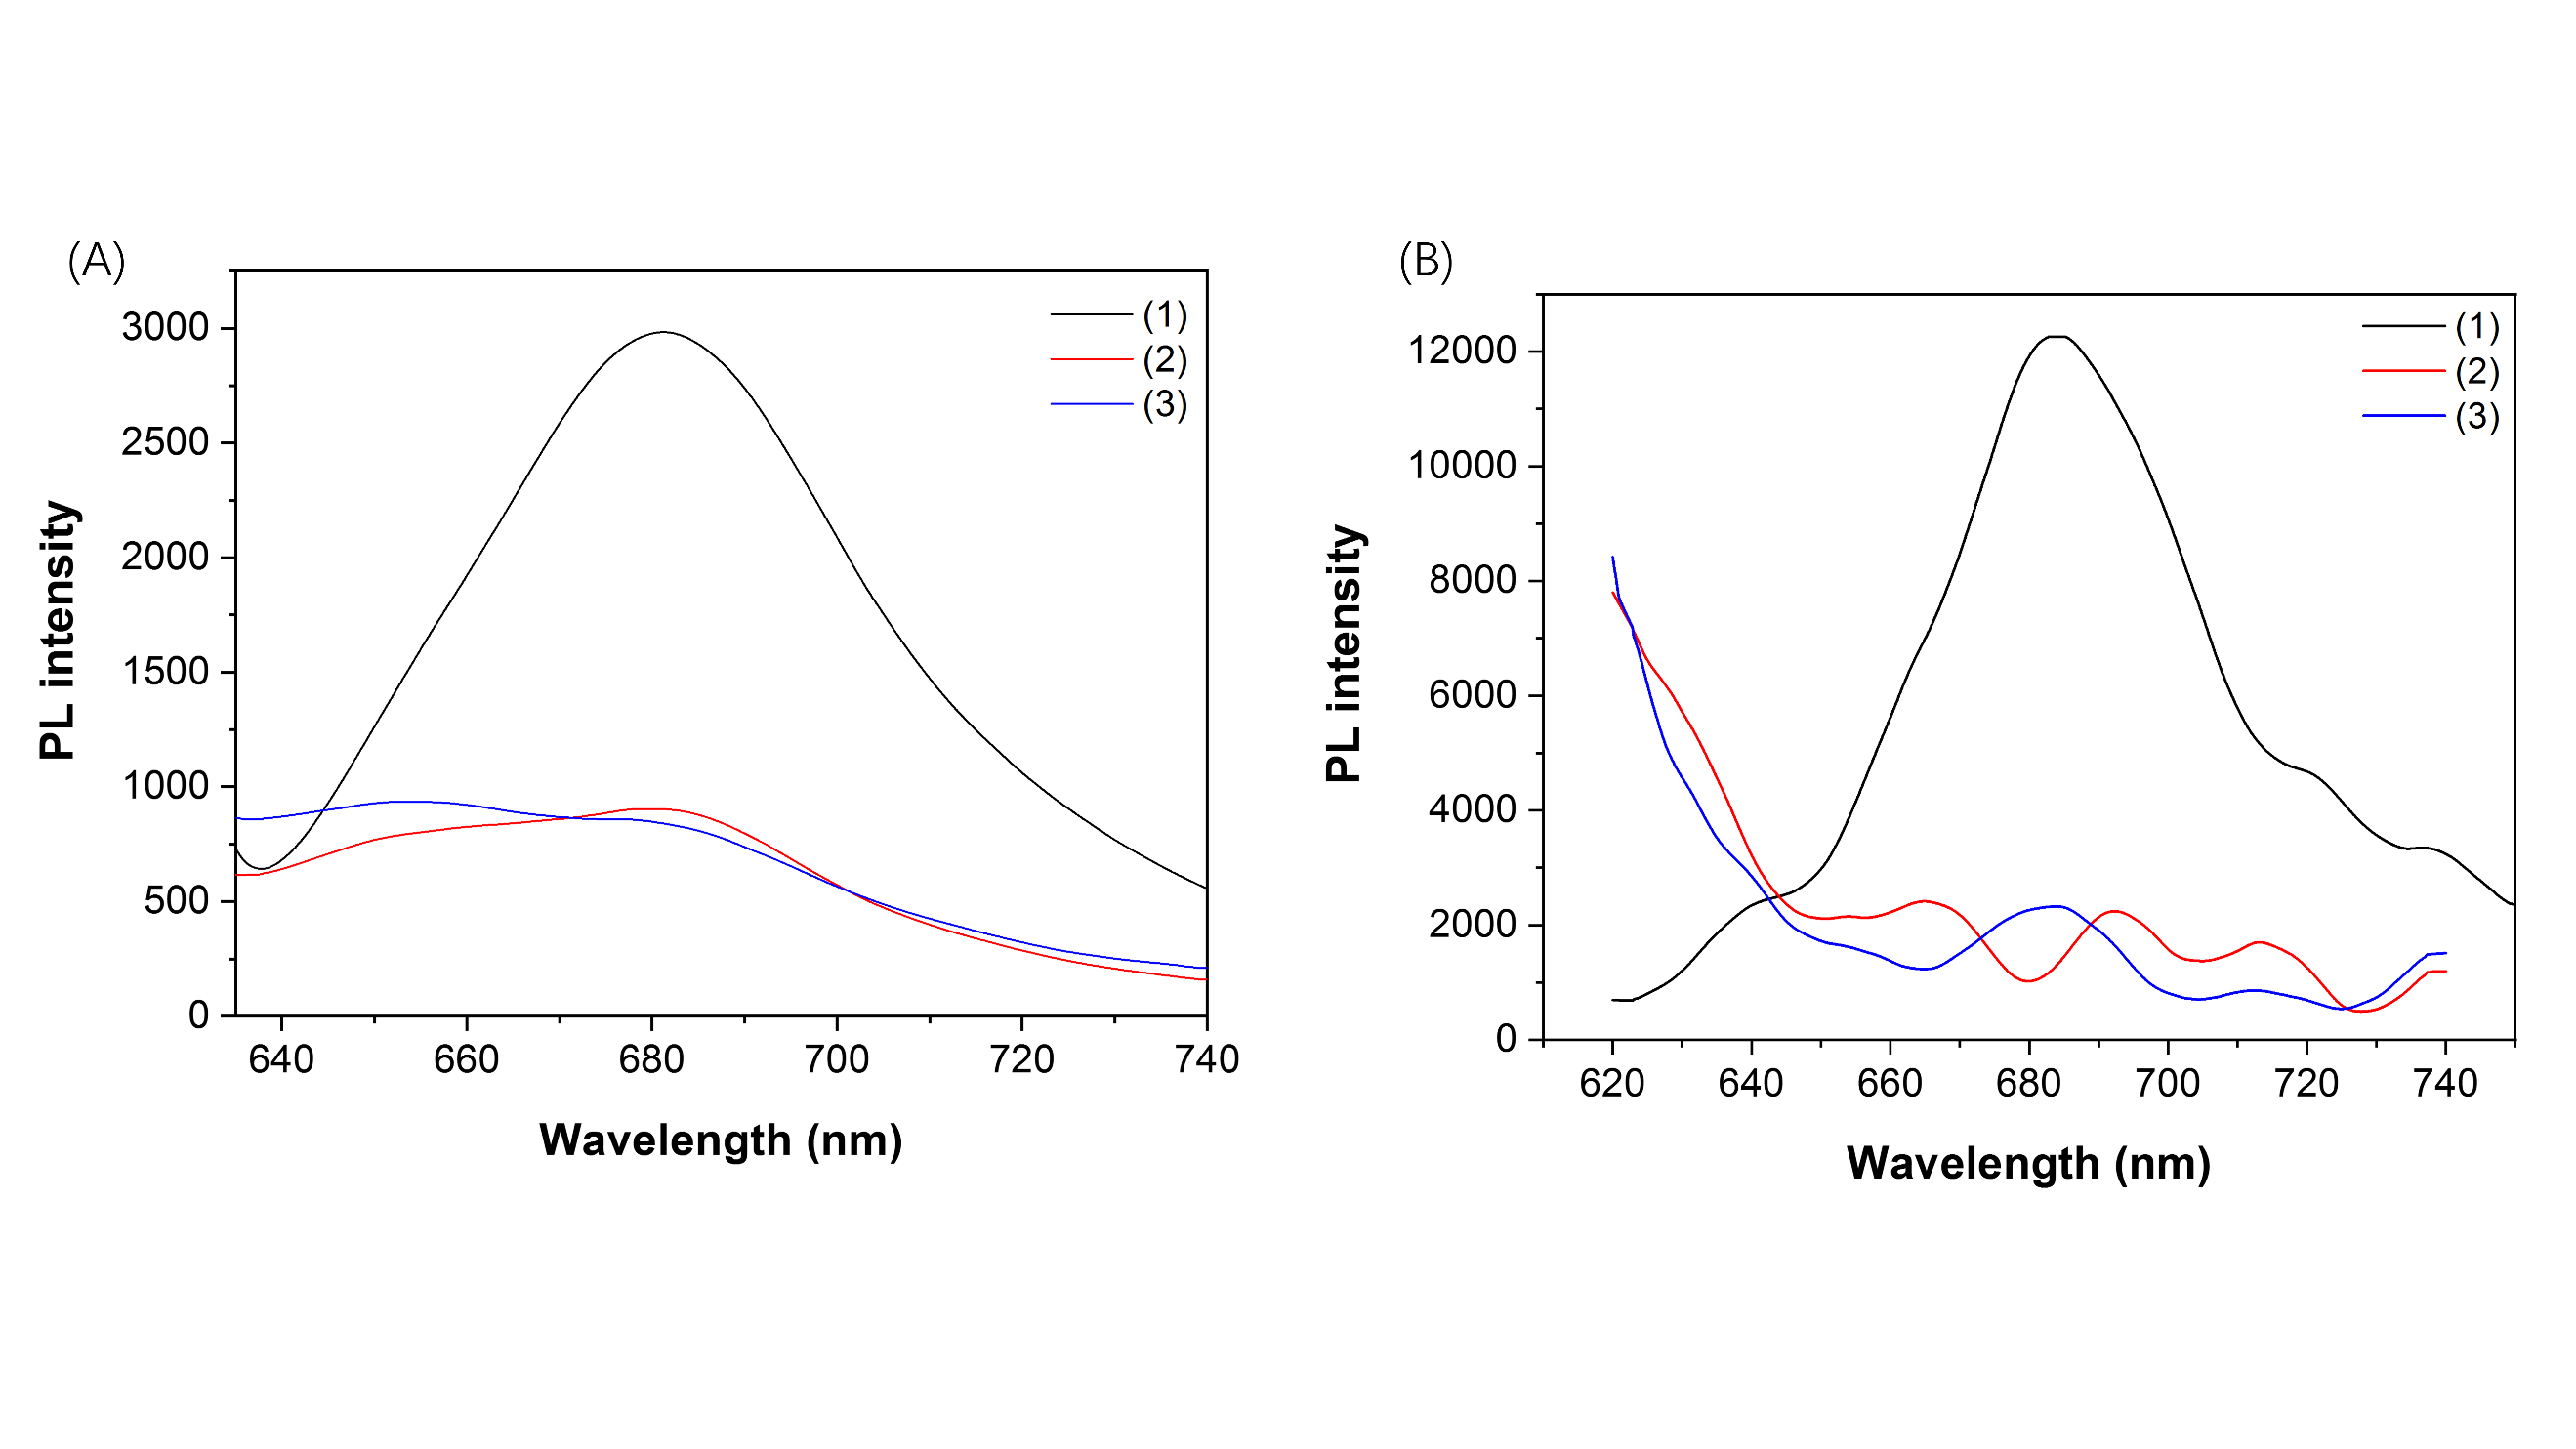


Figure S3 The PL spectra of MG in different conditions (1) MG; (2) in the presence of aptamer; (3) in the presence of nuclease; (A) aptamer for acetamiprid; (B) aptamer for thrombin. Experimental conditions: MG, 10 μM; aptamer, 20 μM.


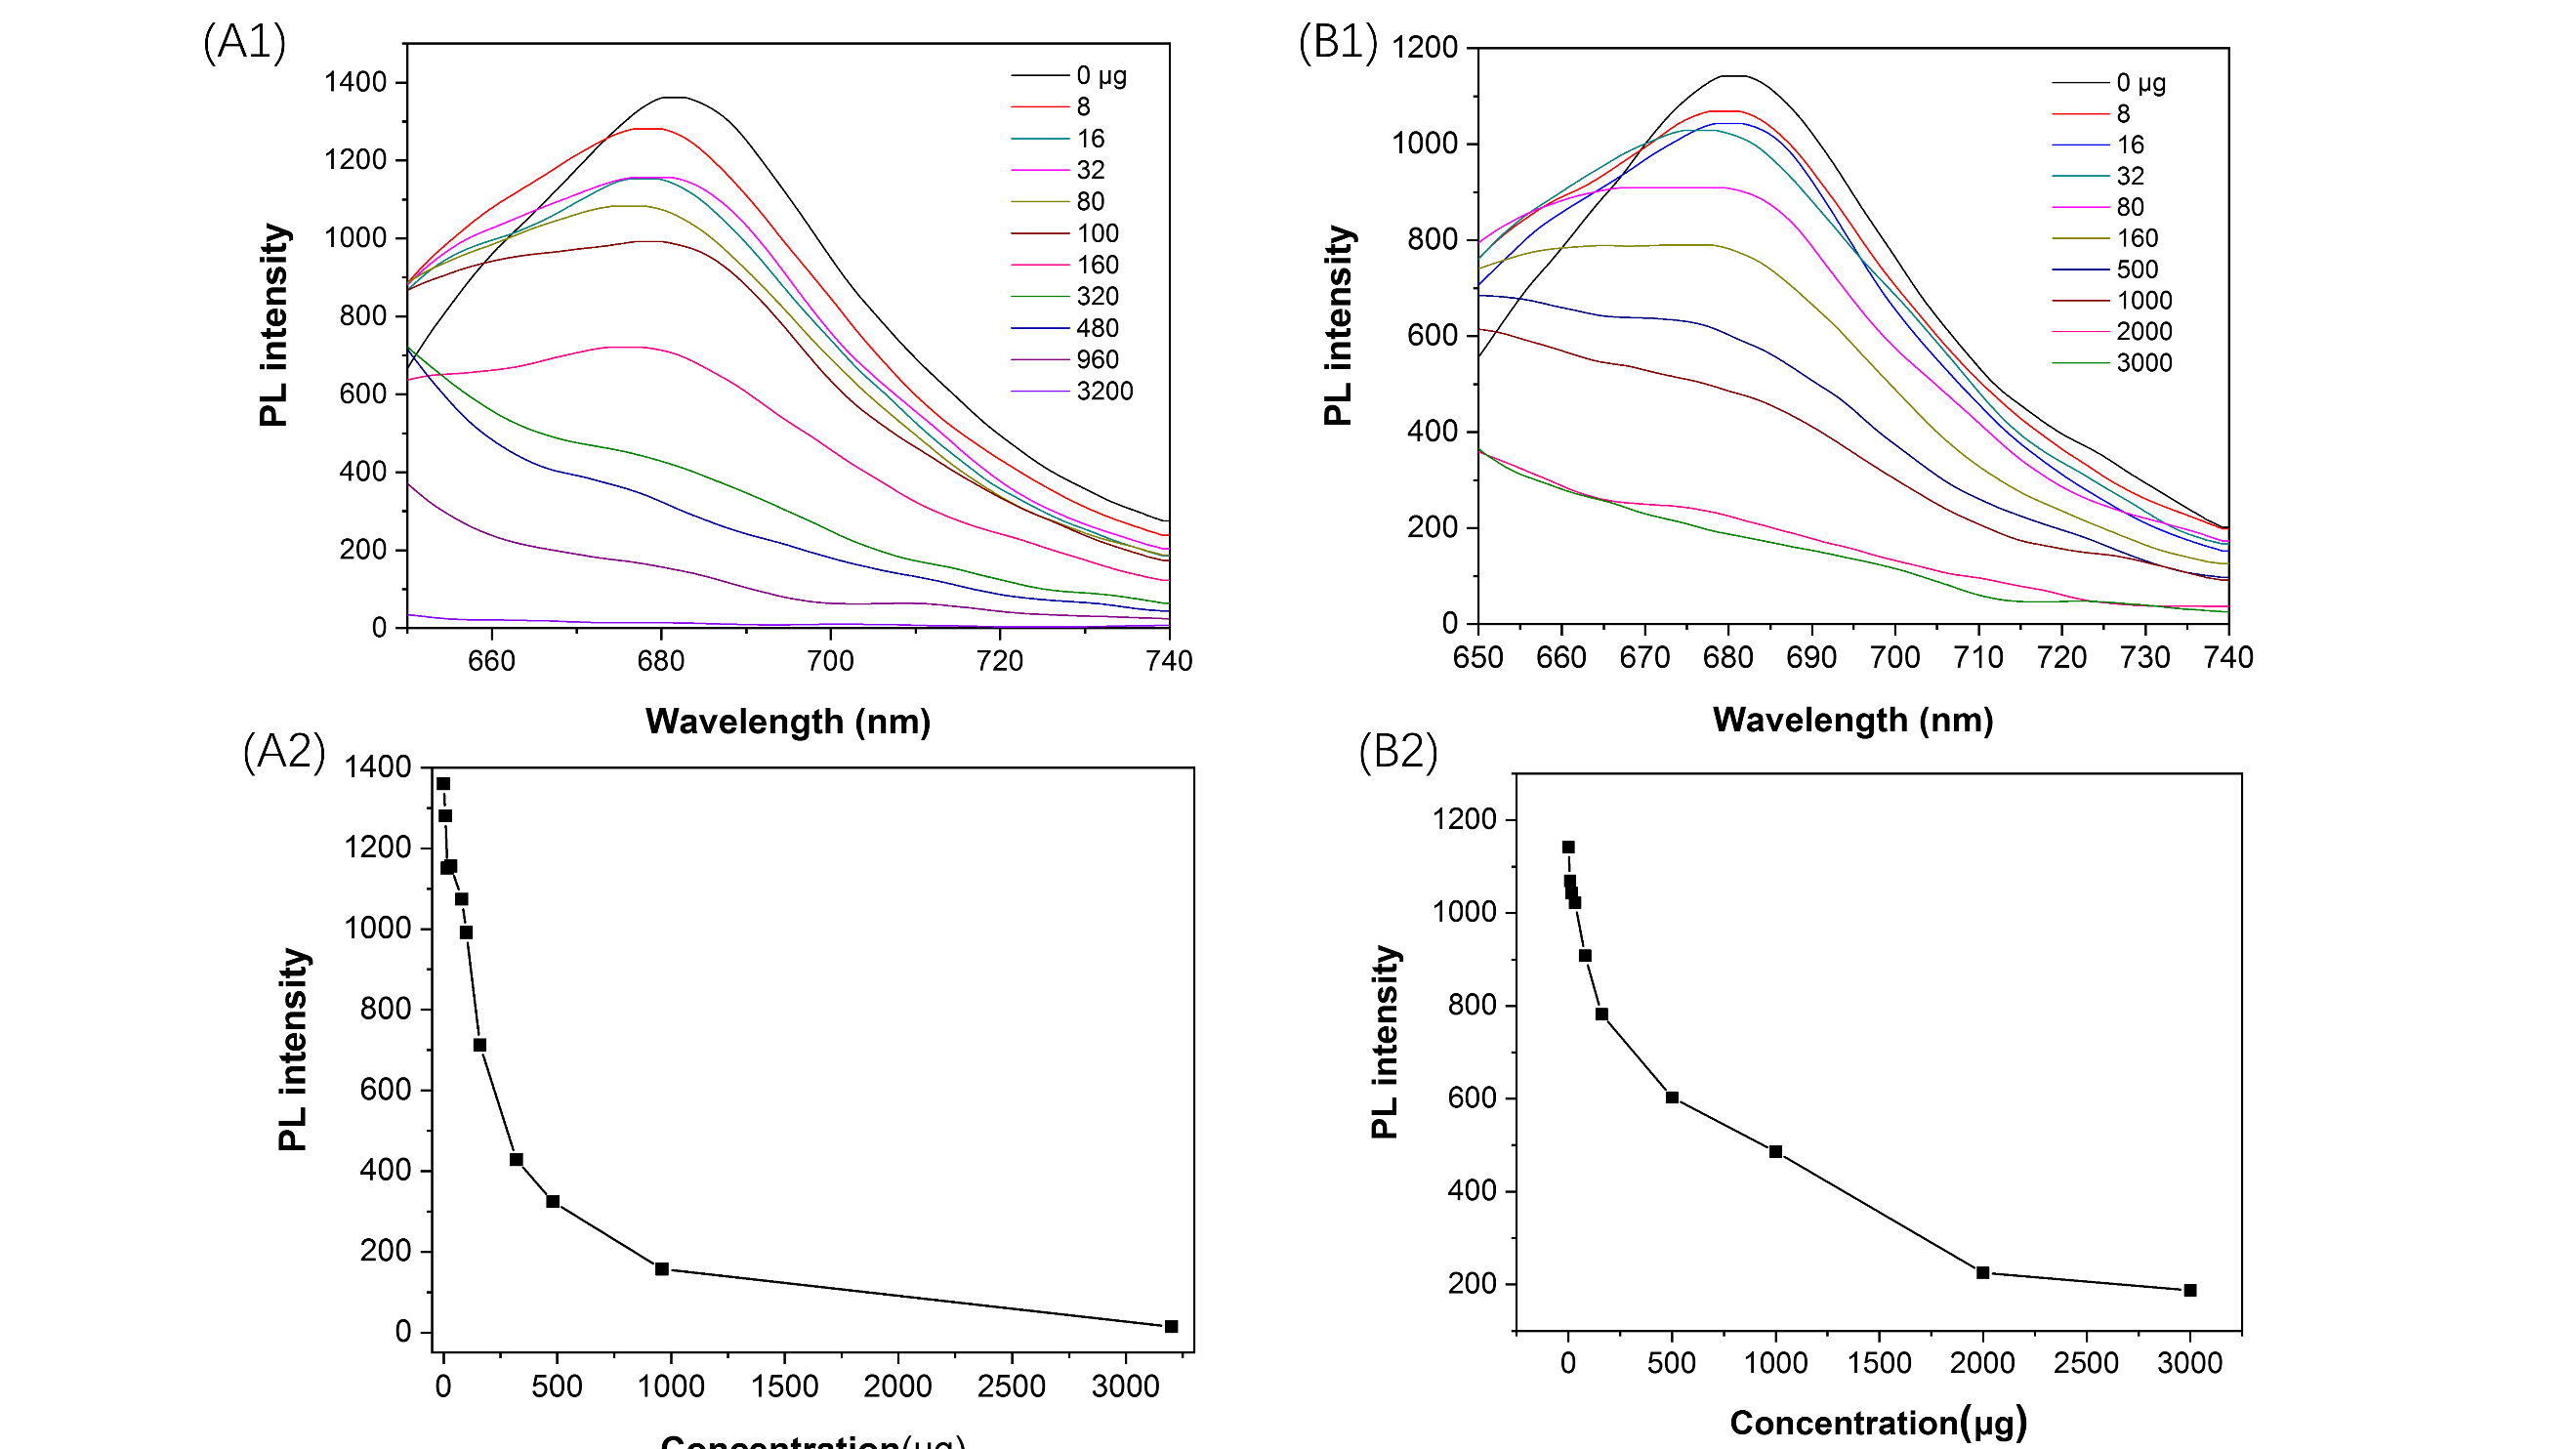


Figure S4 The PL spectra of MG/aptamer complex (A1, B1) and PL intensity change of MG/aptamer complex (A2, B2) in the presence of different amounts of Fe3O4. (A) aptamer for acetamiprid; (B) aptamer for thrombin; (C) aptamer for Pb2+. Experimental conditions: MG, 10 μM; aptamer, 20 μM.


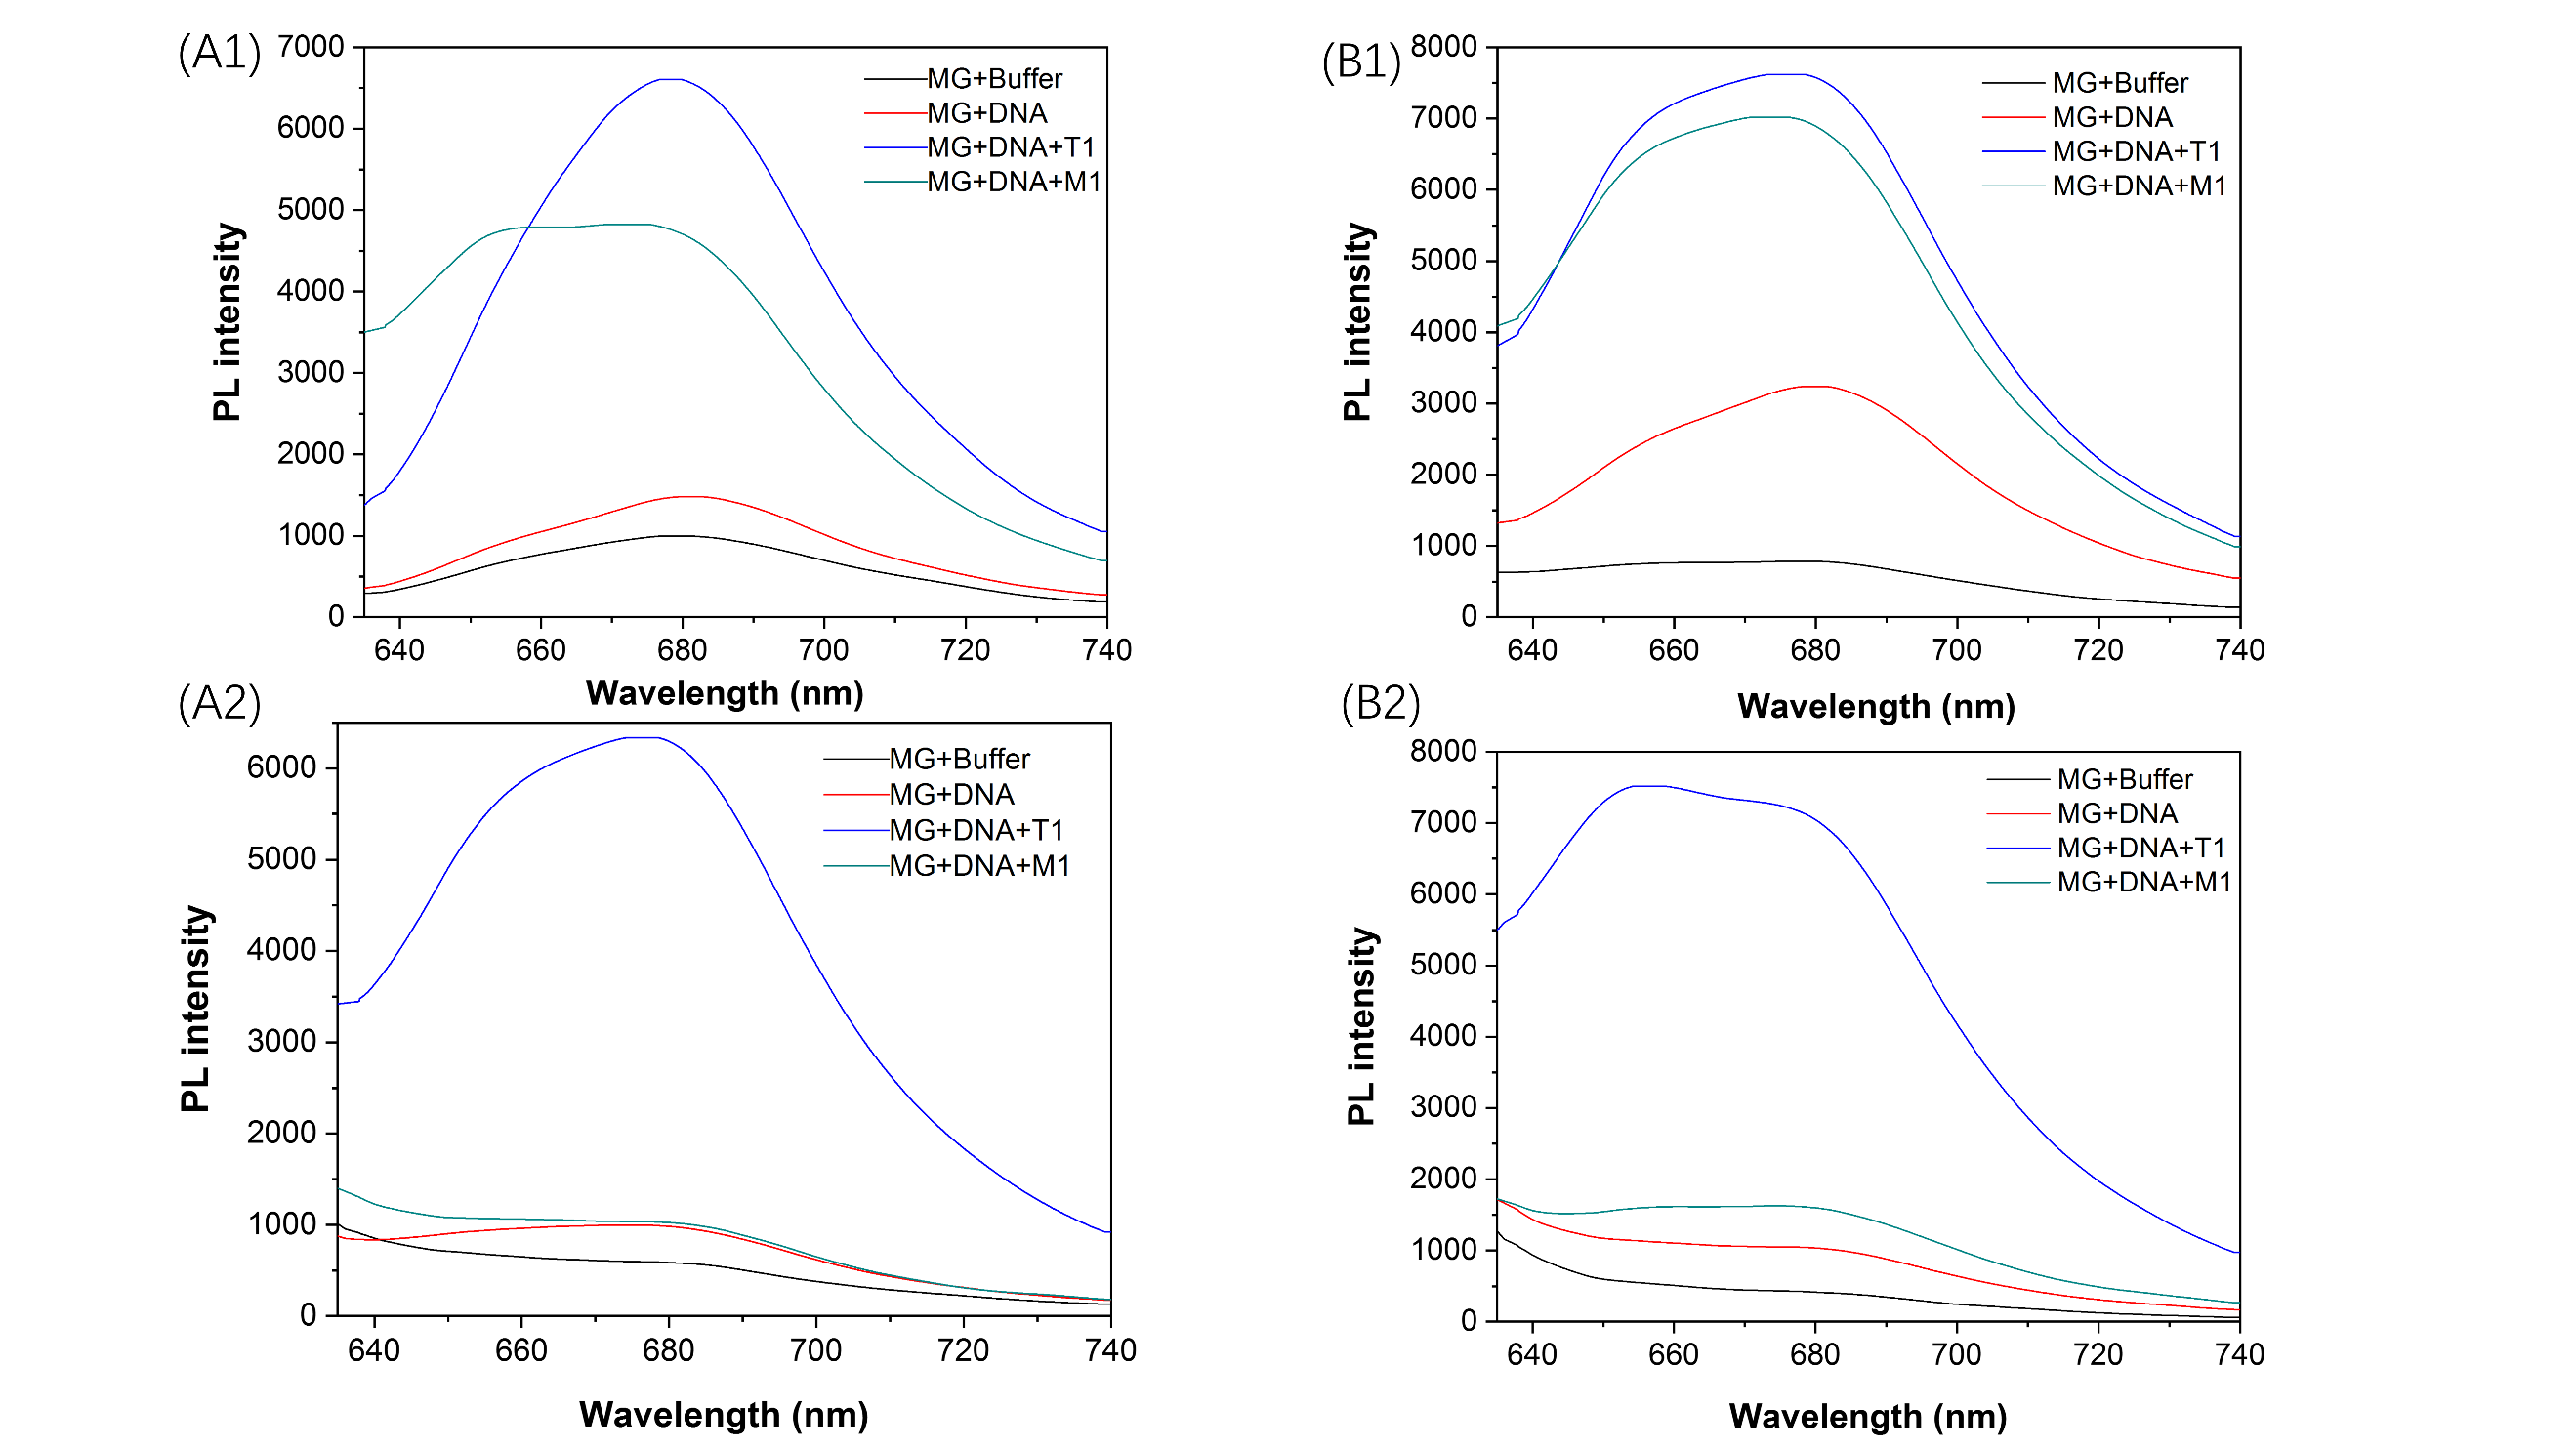


Figure S5 The PL spectra of MG in the absence (A1, B1) and presence (A2, B2) of Fe3O4 at different conditions: M1, mismatch aptamer; T1, targets. Experimental conditions: MG, 10 μM; aptamer, 20 μM; Fe3O4, 2.0 mg.


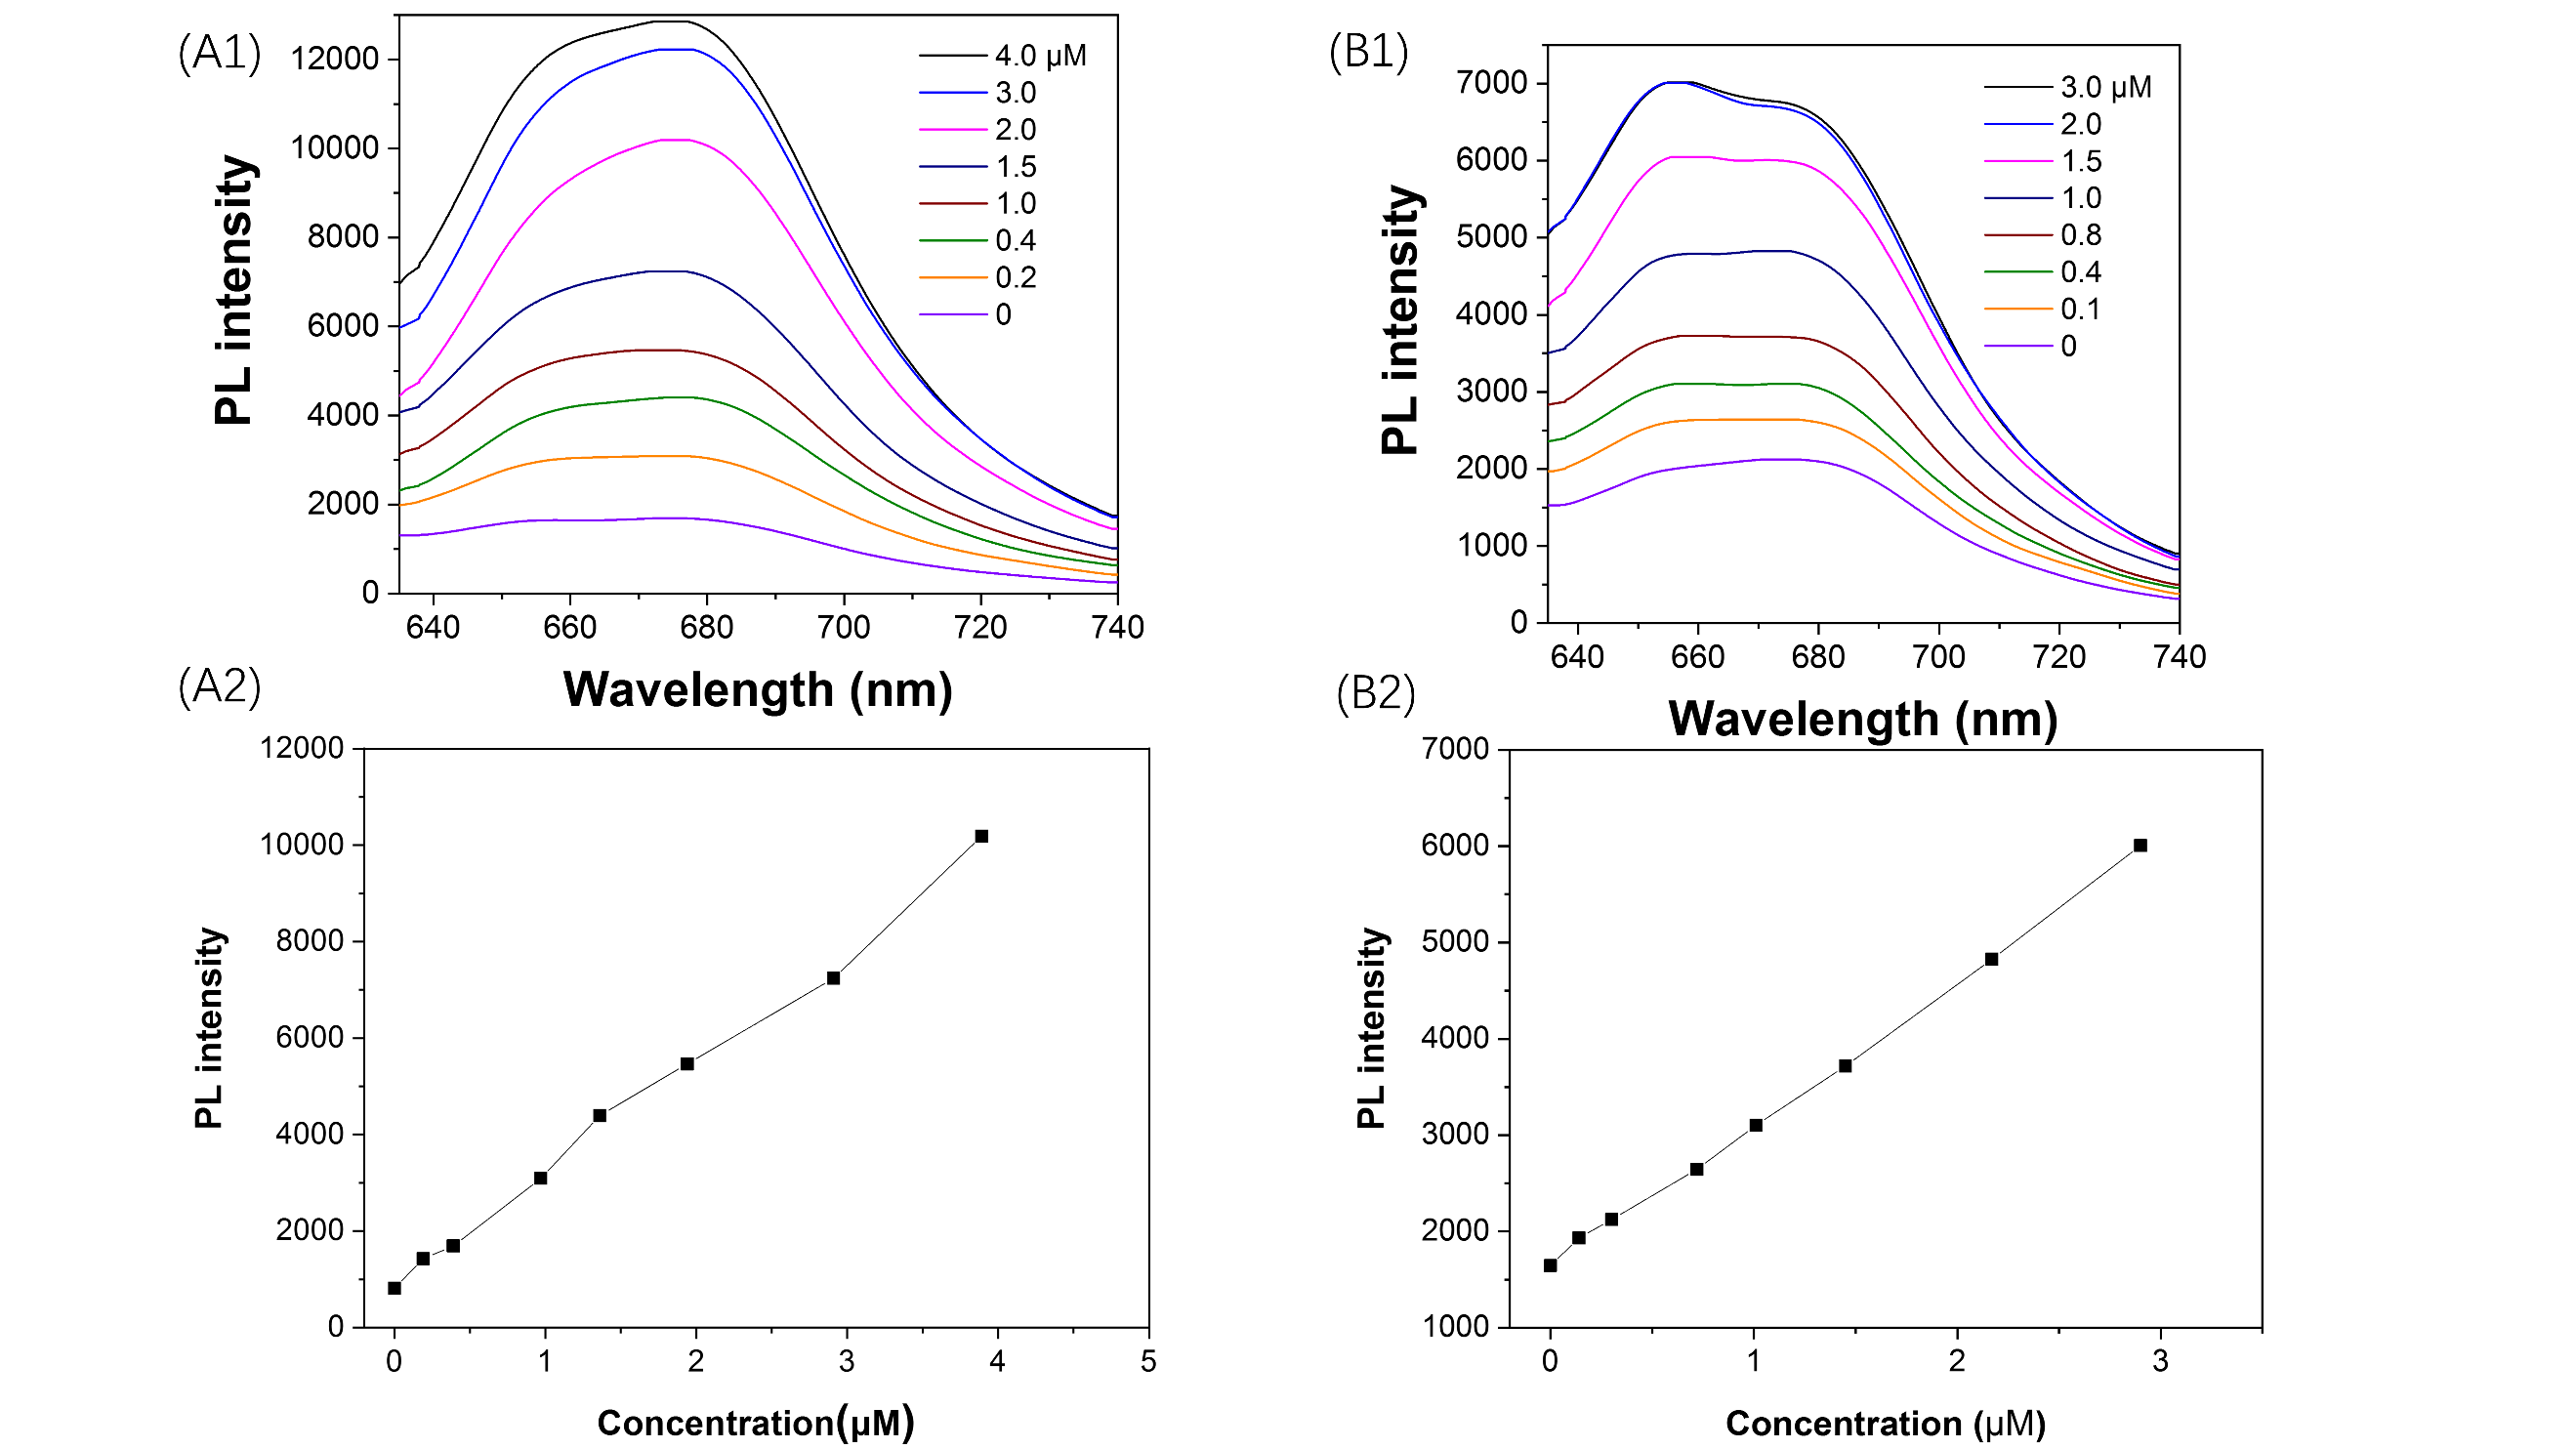
Figure S6 The recovery of PL spectra of TTAPE/aptamer complex (A1, B1) and PL intensity of TTAPE/aptamer (A2, B2) upon addition of different concentrations of complementary chain of aptamer. (A) aptamer for acetamiprid; (B) aptamer for thrombin. MG, 10 μM; aptamer, 20 μM


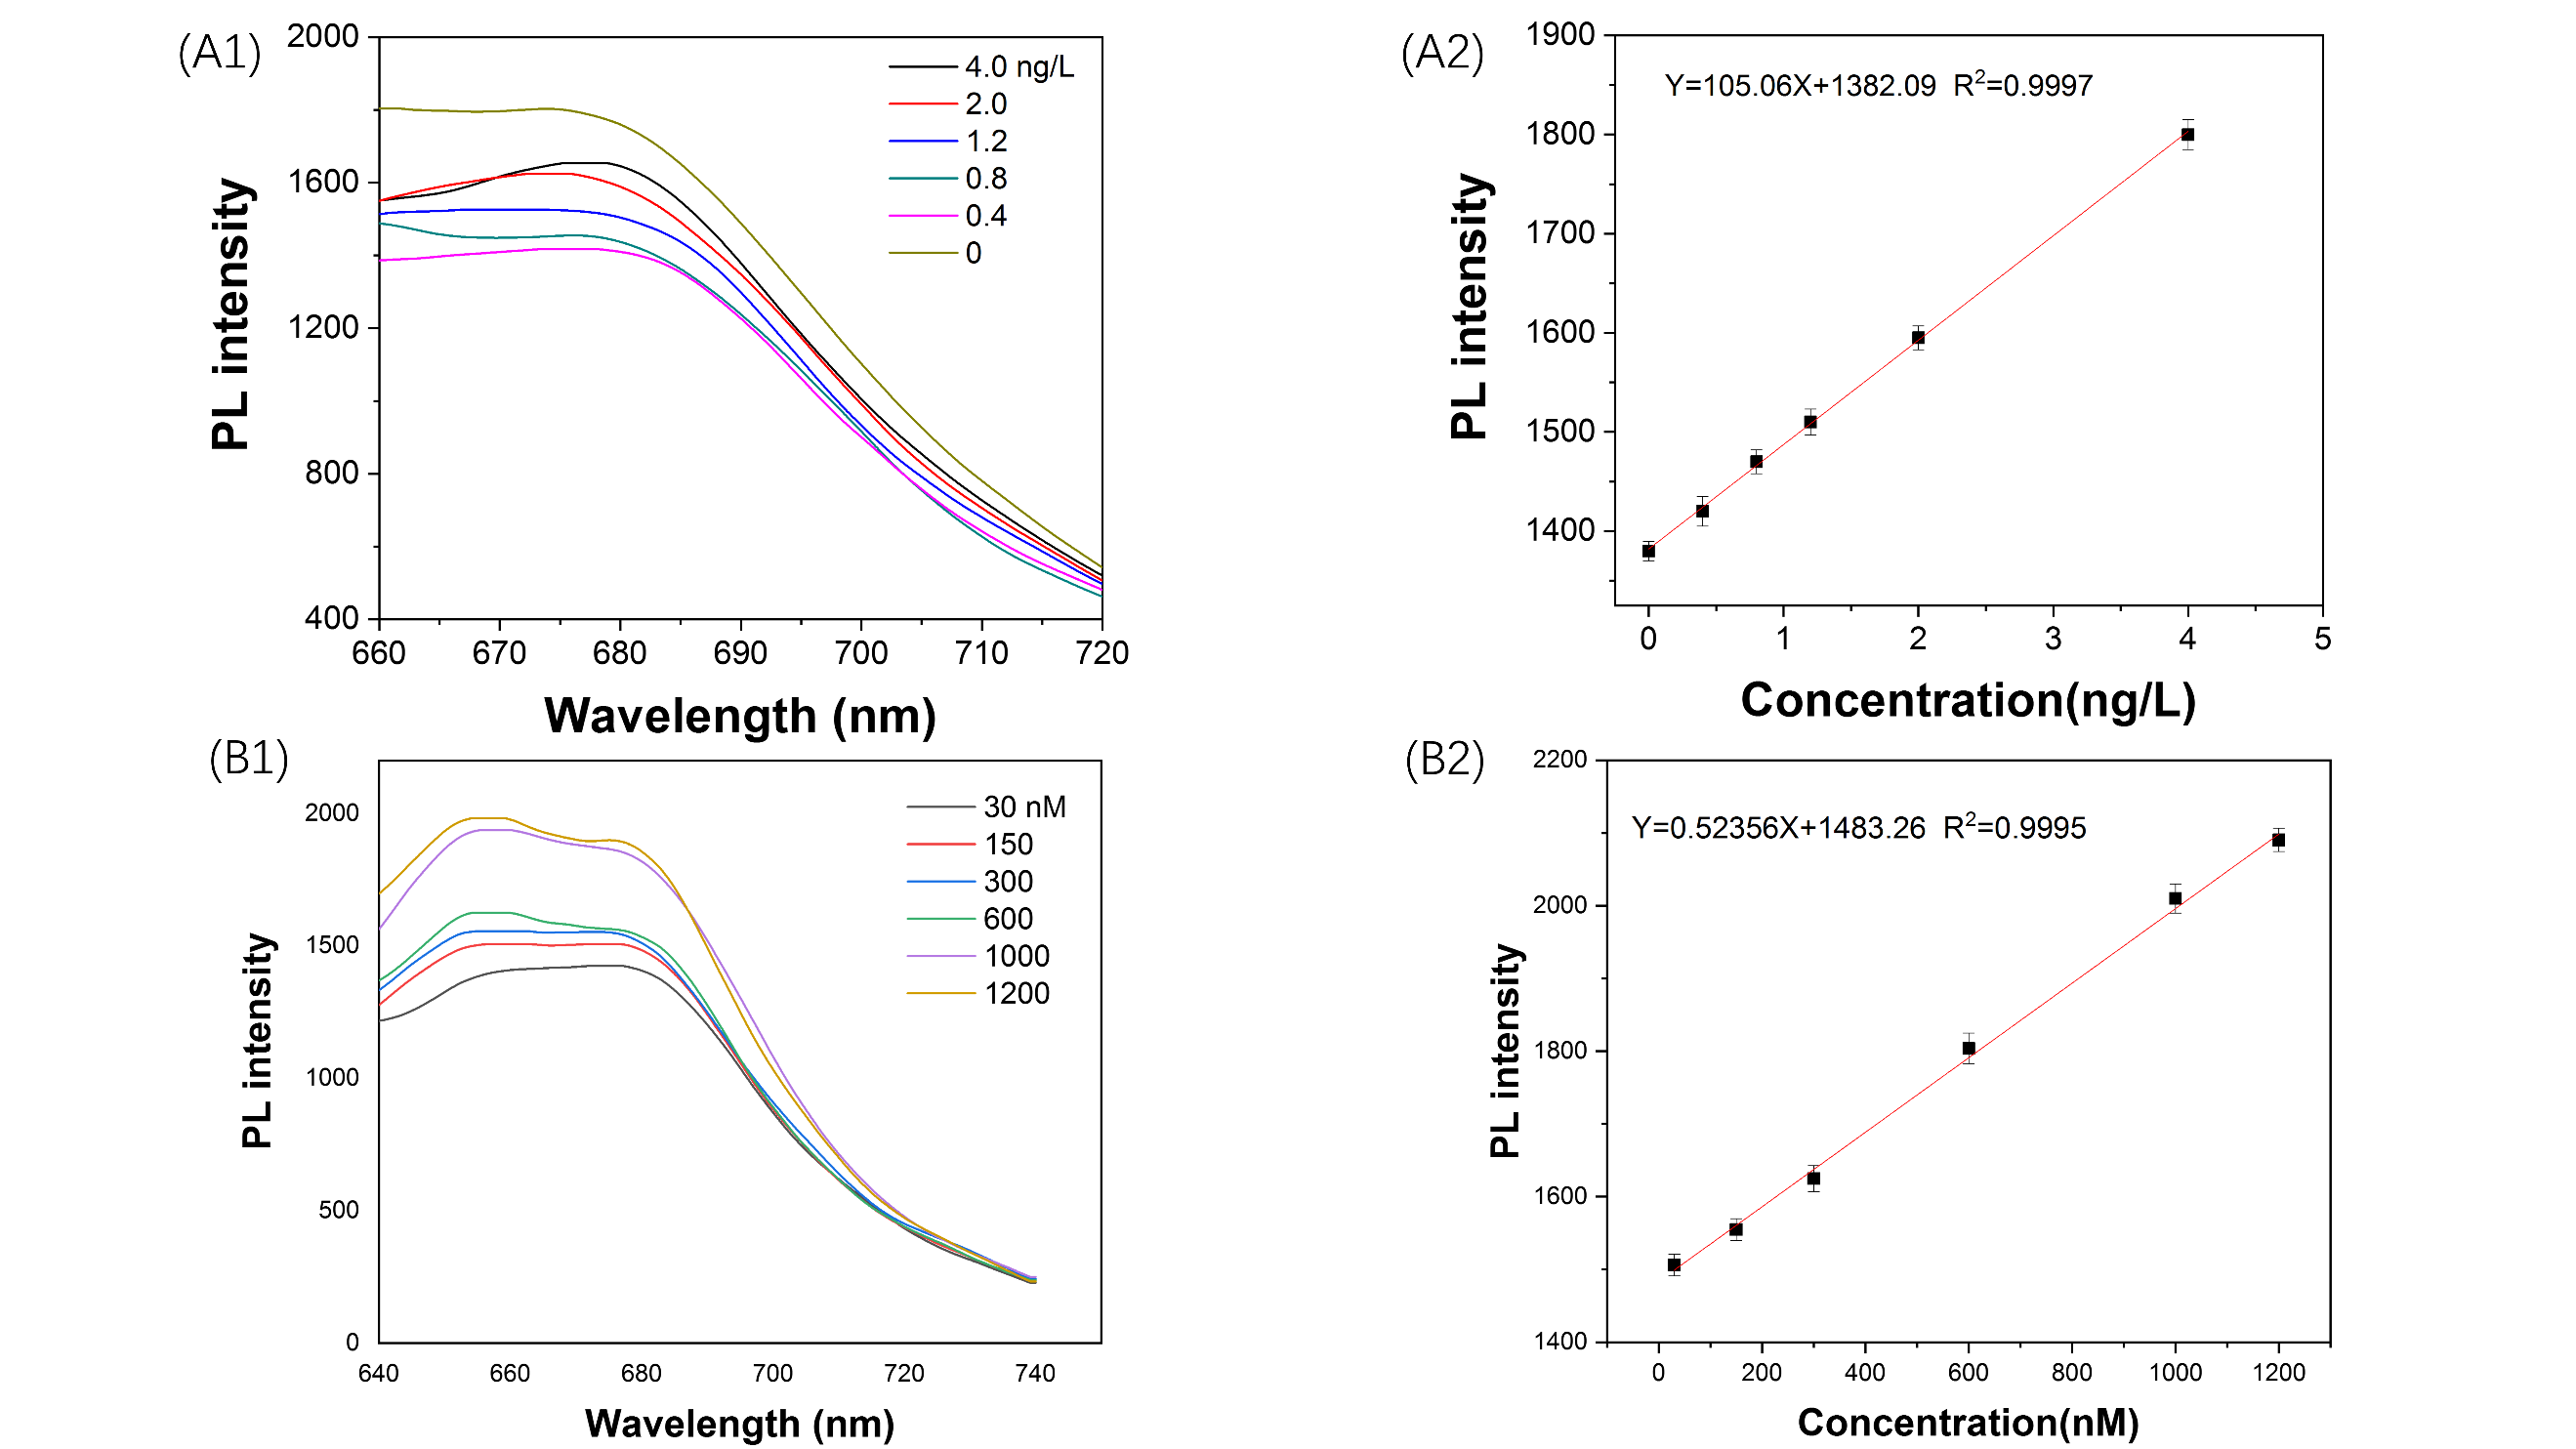


Figure S7 The recovery of PL spectra of TTAPE/aptamer complex (A1, B1, C1) and PL intensity of TTAPE/aptamer (A2, B2, C2) upon addition of different concentrations of targets. (A) aptamer for acetamiprid; (B) aptamer for thrombin; (C) aptamer for Pb2+. MG, 10 μM; aptamer, 20 μM


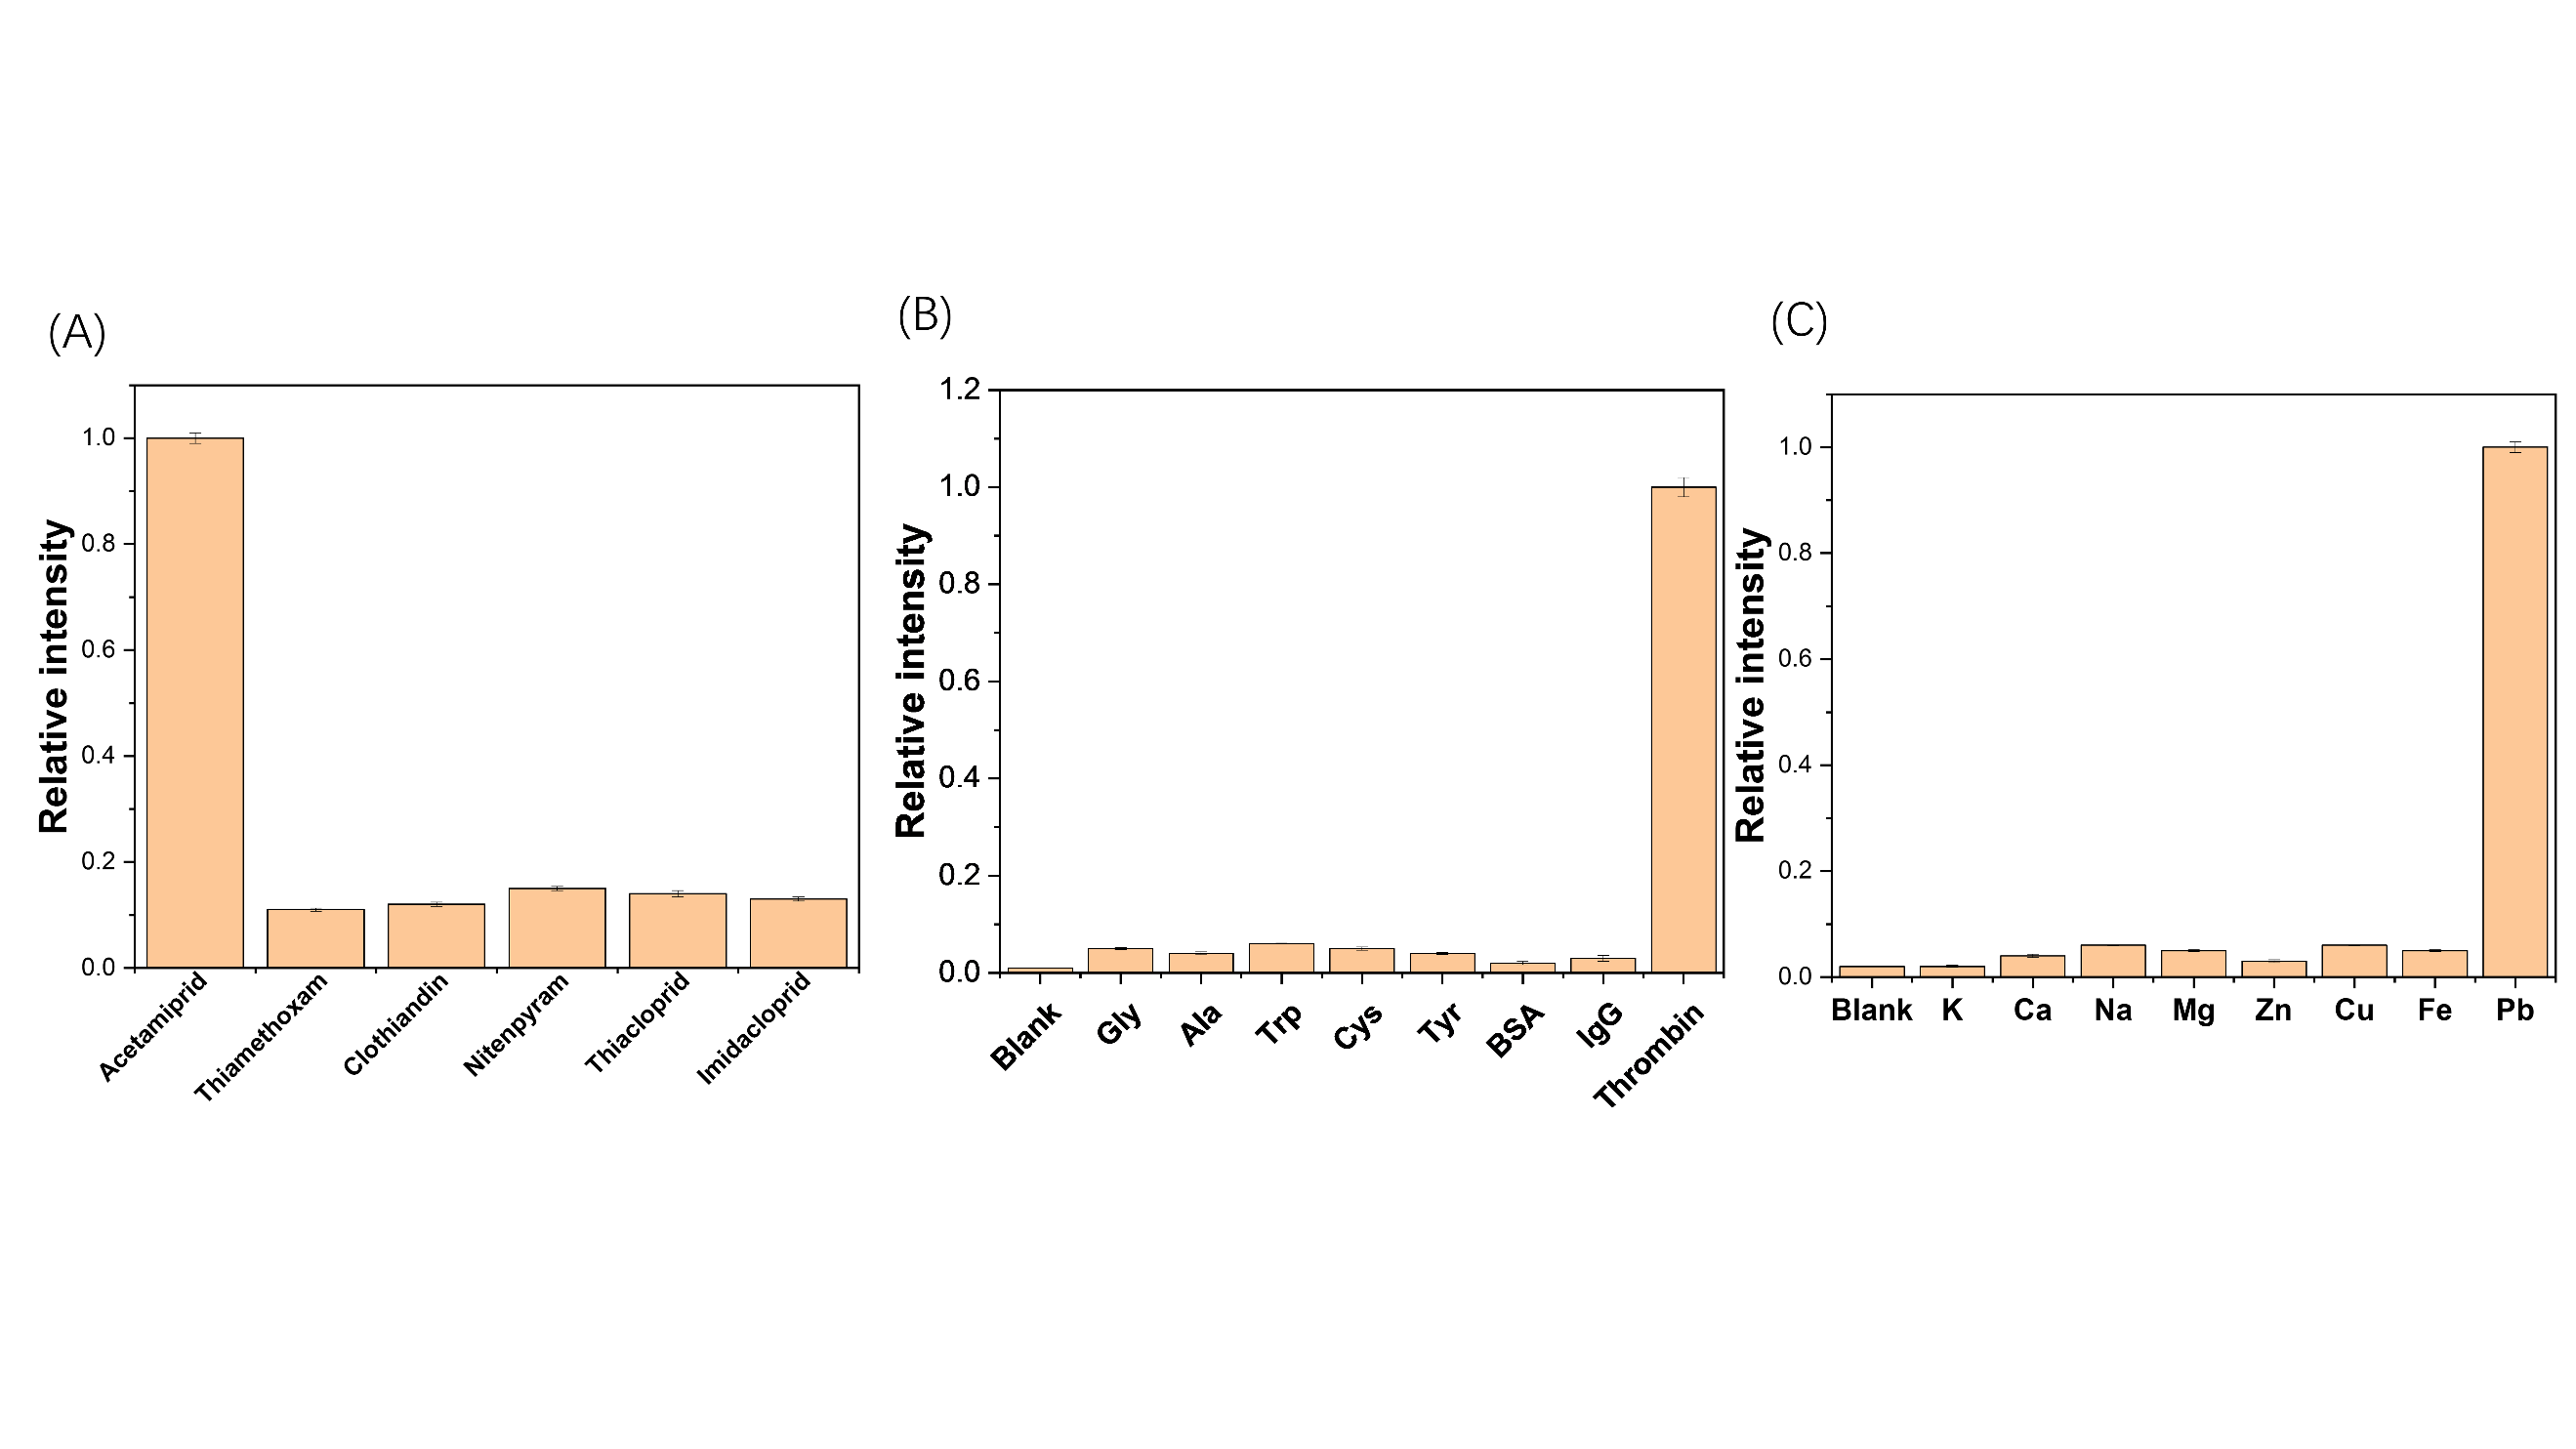


Figure S8 (A) Relative PL intensity of the TTAPE-based biosensor to different targets. The concentration of all interfering species was 1 μM, and acetamiprid was 20 ng/L. (B) Relative PL intensity of the TTAPE-based biosensor to different targets. The concentration of all compounds was 20 ng/L.


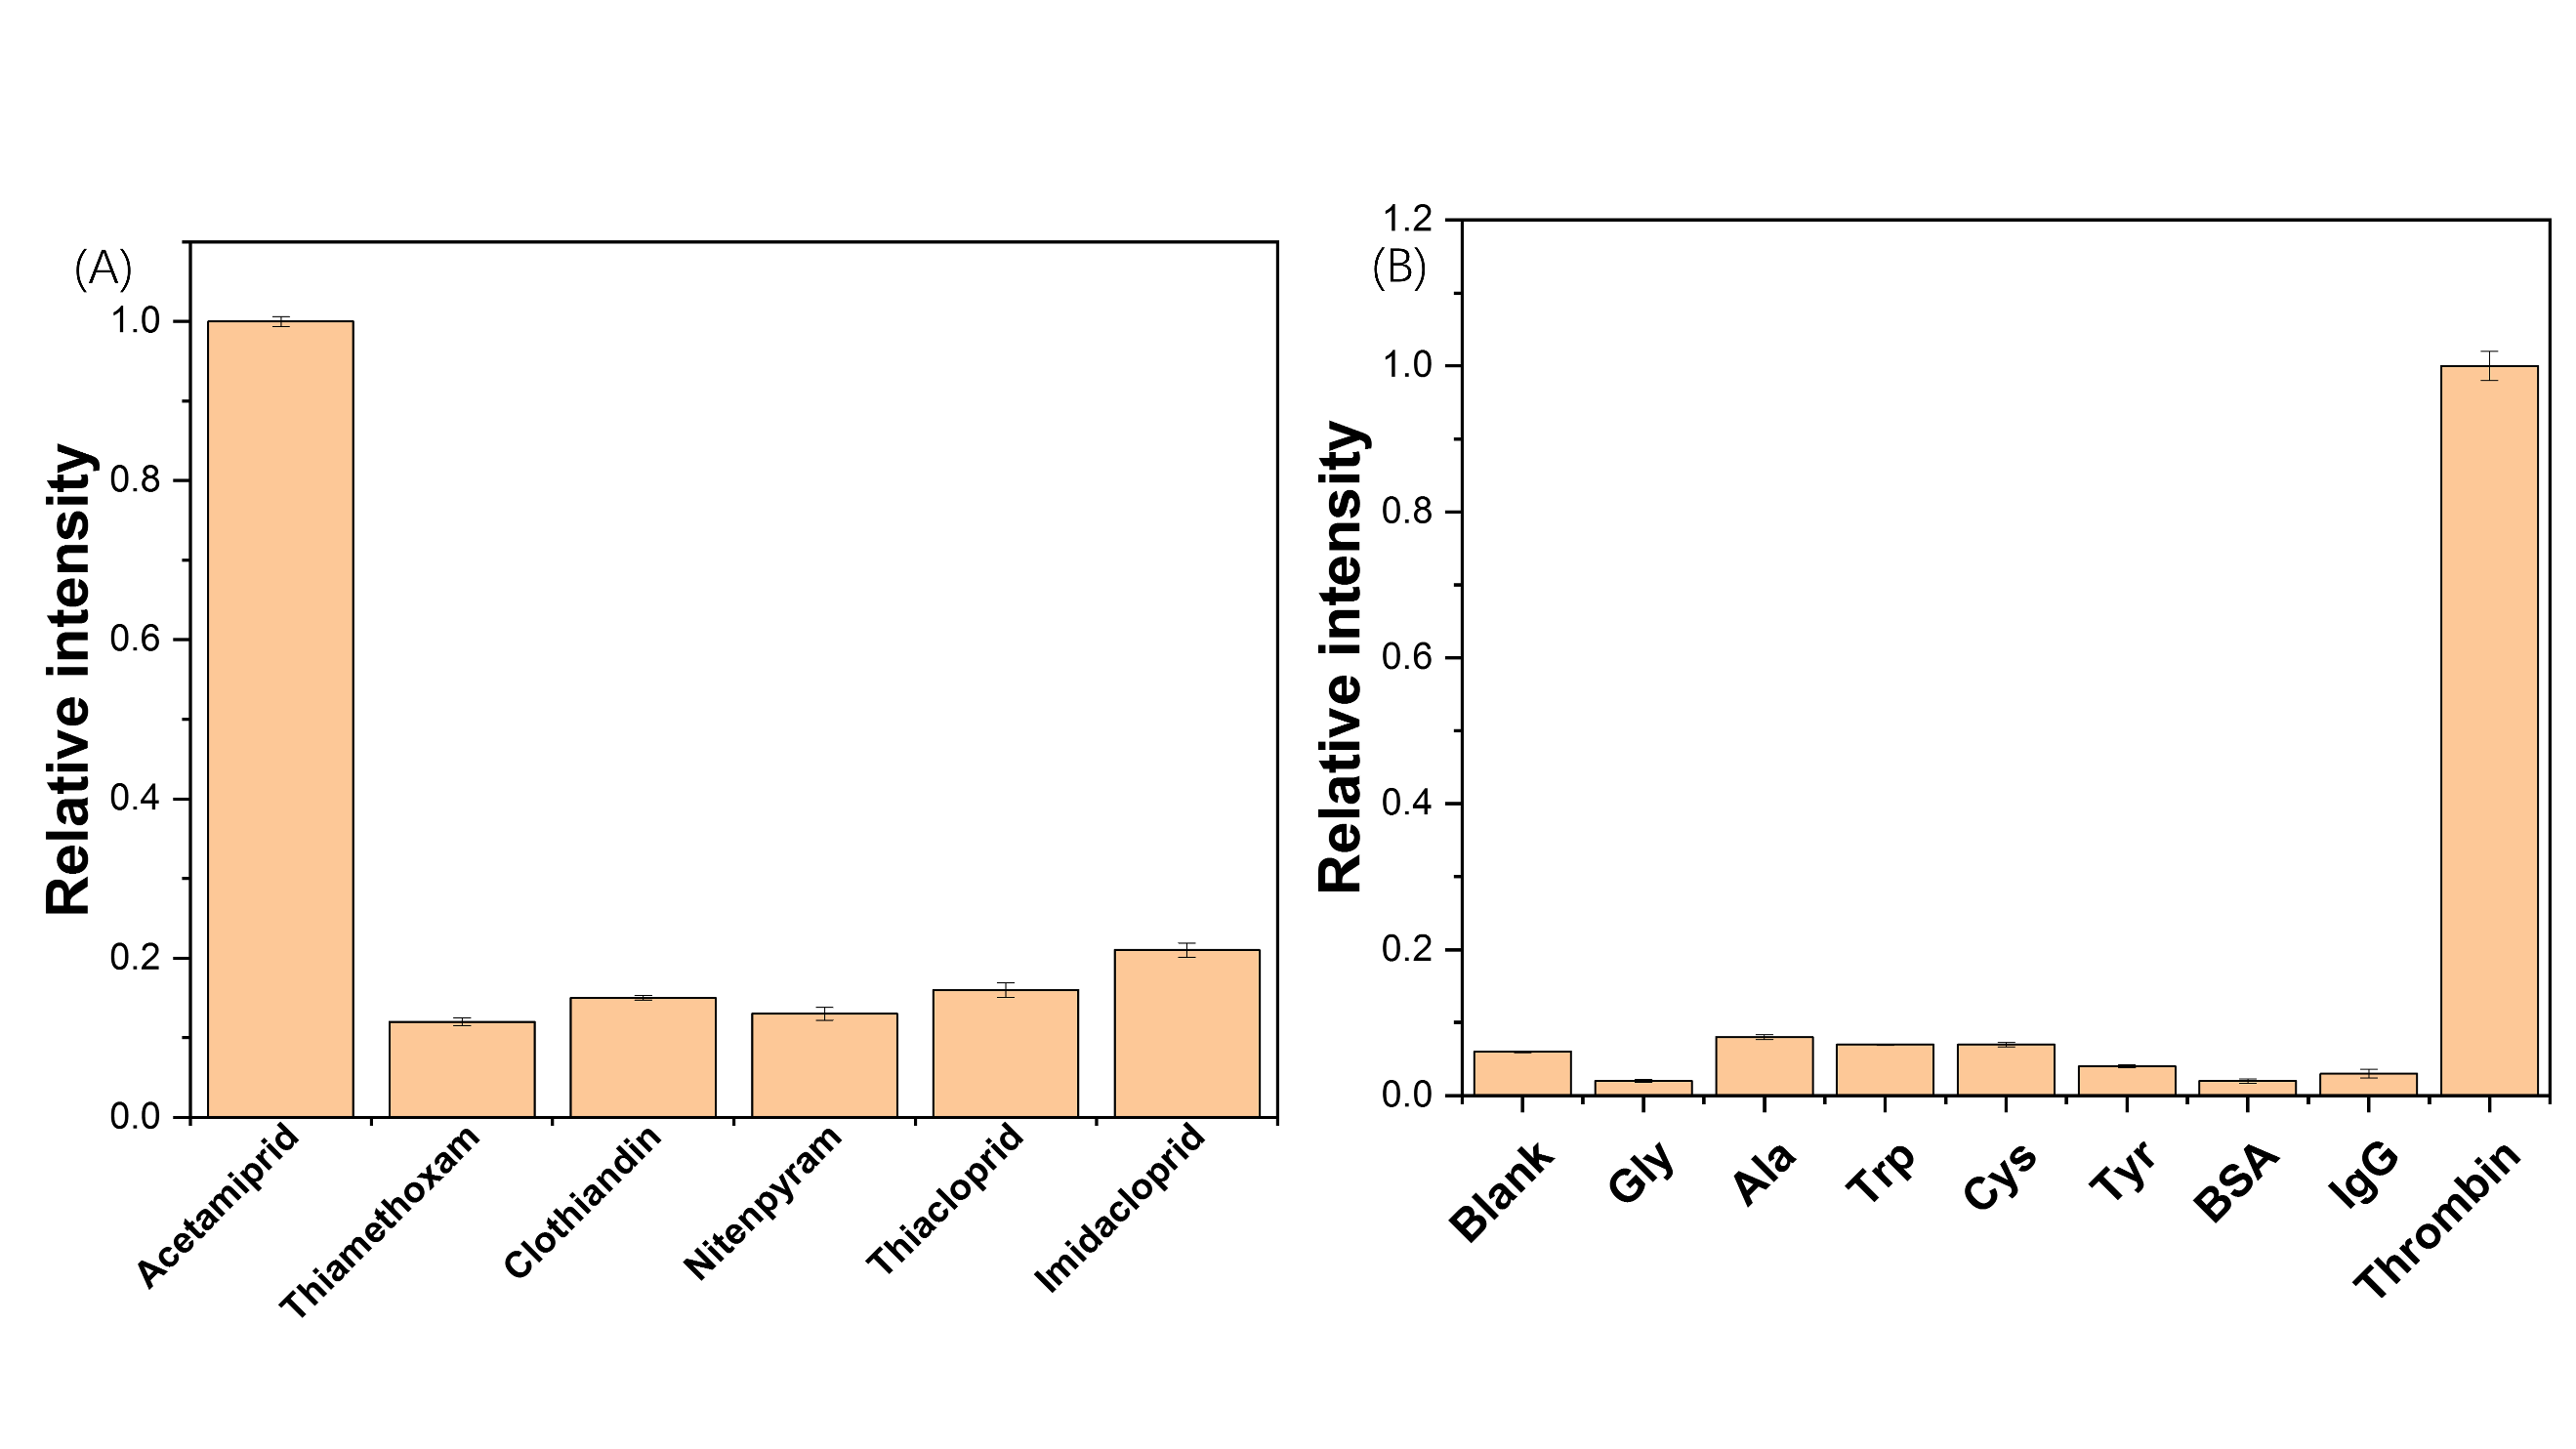
Figure S9 Relative PL intensity of the MG-based biosensor to different targets. The concentration of all interfering species was 1 μM, and acetamiprid was 20 ng/L. b. Relative PL intensity of the MG-based biosensor to different targets. The concentration of all compounds was 20 ng/L.

Table S1 Analytical results of the determination of acetamiprid, thrombin and Pb2+ using the MG based-aptasensor

|  | Measured | Added | Found | Recovery (%) | RSD (n = 3, %) |
| --- | --- | --- | --- | --- | --- |
| acetamiprid | 0.18 | 0.2 μg/L |  | 98 | 6.9 |
|  | 0.4 μg/L |  | 93 | 8.1 |
|  | 0.6 μg/L |  | 90 | 4.3 |
| thrombin | - | 100 nM |  | 81 | 5.5 |
| - | 200 nM |  | 87 | 7.8 |
| - | 300 nM |  | 86 | 9.2 |
